# Supplementary material for: Polarization behavior of bone marrow-derived macrophages on charged P(VDF-TrFE) coatings
Source: Royal Society of Chemistry journal article supplement (doi:10.1039/d0bm01604g), 2020-11-14
Supplement: d0bm01604g1.pdf [file d0bm01604g1.pdf]

## Polarization behavior of bone marrow-derived macrophages on charged P(VDF-TrFE) coatings

Zhiying Wang<sup>a,#</sup>, Xuzhao He<sup>a,#</sup>, Bolin Tang<sup>c,\*</sup>, Xiaoyi Chen<sup>b,\*</sup>, Lingqing Dong<sup>b</sup>, Kui Cheng<sup>a</sup>, Wenjian Weng<sup>a,\*</sup>

<sup>a</sup> School of Materials Science and Engineering, State Key Laboratory of Silicon Materials, Zhejiang University, Hangzhou 310027, China.

<sup>b</sup> The Stomatologic Hospital, School of Medicine, Zhejiang University, Hangzhou 310003, China.

<sup>c</sup> College of Materials and Textile Engineering, Jiaying University, Jiaying 314001, China.

# These authors contributed equally to this work.

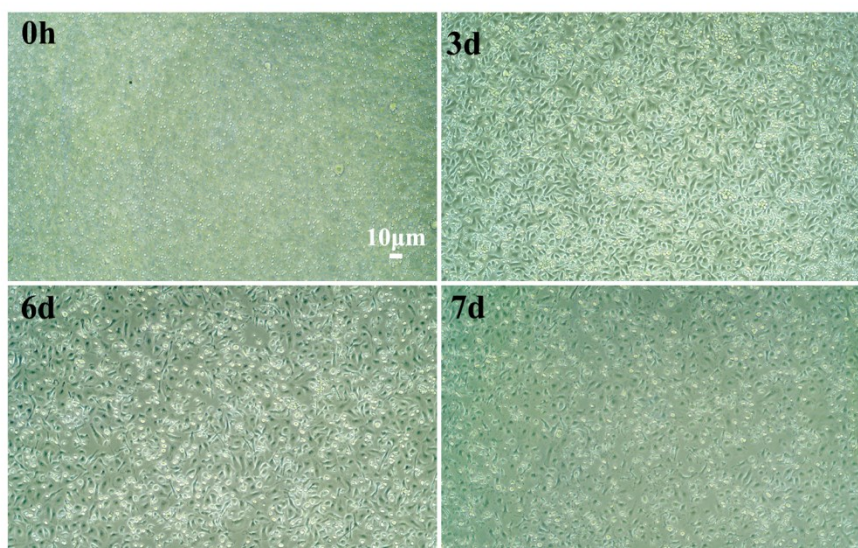

Figure S1. Induction of bone-marrow derived macrophages (BMDMs) by M-CSF.

Table S1. Primers used for real-time PCR.

| Gene          | Forward primer sequence (5'–3') | Reverse primer sequence (5'–3') |
|---------------|---------------------------------|---------------------------------|
| CD80          | GCCTTGCCGTTACAACCTC             | TACTCGGGCCACACTTTT              |
| TNF- $\alpha$ | CGCTGAGGTCAATCTGC               | GGCTGGGTAGAGAATGGA              |
| CD206         | CAAGCGATGTGCCTACC               | AATGCTGTGGATACTTGCC             |
| IL-10         | GCCCTTTGCTATGGTGTC              | TCTCCCTGGTTTCTCTTCC             |
| $\alpha$ M    | CGCAAGAACACCAAGGA               | TCAAAGAAGGCACGGATA              |
| $\beta$ 2     | GGAGCATCGAGTATAGGCA             | ACTGTATCCGTGAAACCCA             |
| $\alpha$ 5    | ACTGCCACCTGCCAAGAT              | GACTGTGCTGCTTGTCTGC             |
| $\beta$ 1     | AGCAACAATTCACCCACAG             | TTCGAGACAGAGCAAGCA              |
| Kv1.3         | TGTGGATGGGAGGATGTT              | CTTTGGGGAGTTTTCTGCT             |
| actin         | GCTCCGGCATGTGCAAAG              | CCTTCTGACCCATTCCCAC             |

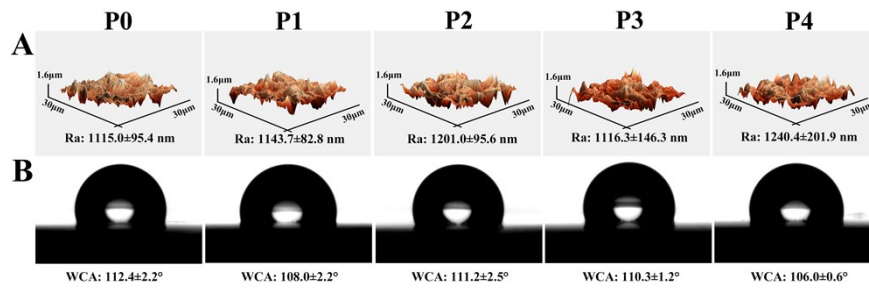

Figure S2. AFM images (A) and water contact angles (B) of the P(VDF-TrFE) coatings.

Table S2. Surface potential intensity of P(VDF-TrFE) coatings after electrically poled treatment.

| Group | Surface potential (-mV) |
|-------|-------------------------|
| P0    | 54                      |
| P1    | 65                      |
| P2    | 68                      |
| P3    | 71                      |
| P4    | 85                      |

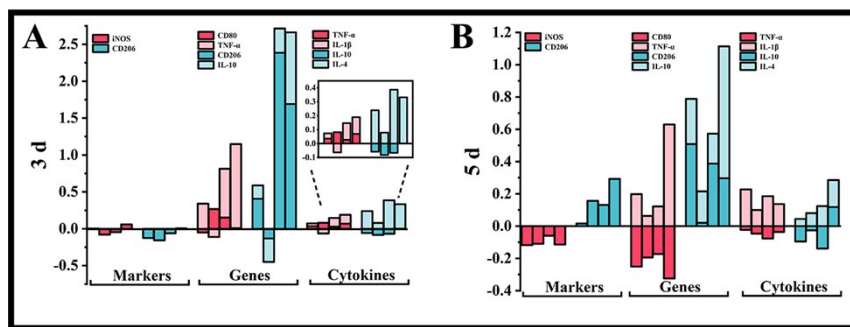

Figure S3. Semi-quantitative statistics of fluorescence intensity of macrophages surface markers and changes in gene expression and cytokines secretion of macrophages at 3 days (A) and 5 days (B) (each of the four bars represents the change range of P1, P2, P3, P4 compared with P0).

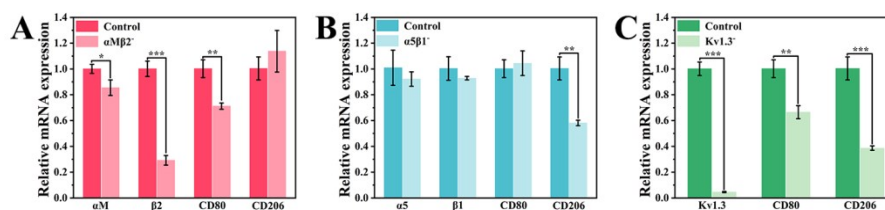

Figure S4. Effect of  $\alpha M\beta 2$  (A),  $\alpha 5\beta 1$  (B) and Kv1.3 (C) inhibition on mRNA expressions of corresponding integrin, potassium ion channel and phenotypic gene (CD80 and CD206) on P0 coatings.
